# Supplementary material
Source: Research Square preprint supplement (doi:10.21203/rs.3.rs-9206791/v1)
Supplement: Supplementary file 1 [file cdd9ff60778d44854eb679a1.pdf]

# Supplementary Fig. S1

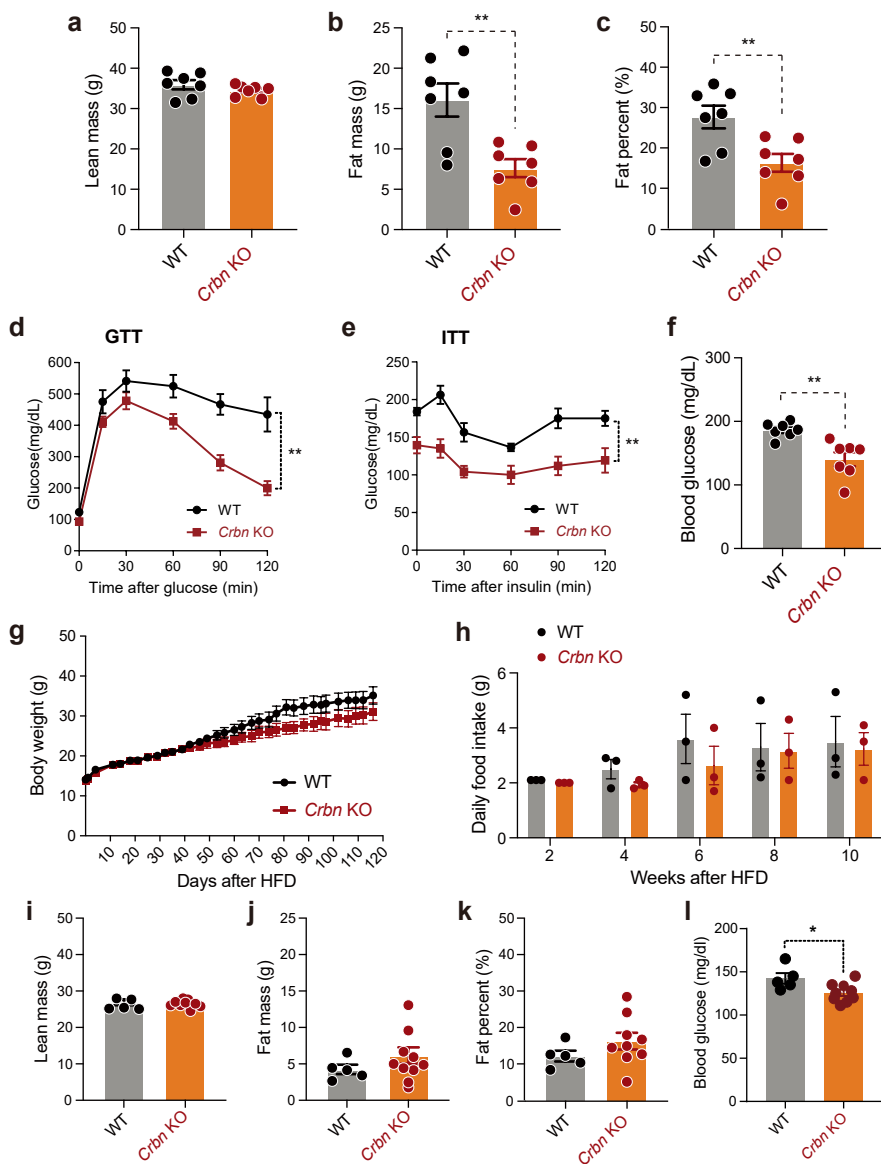

# Supplementary Fig. S2

Normal chow diet

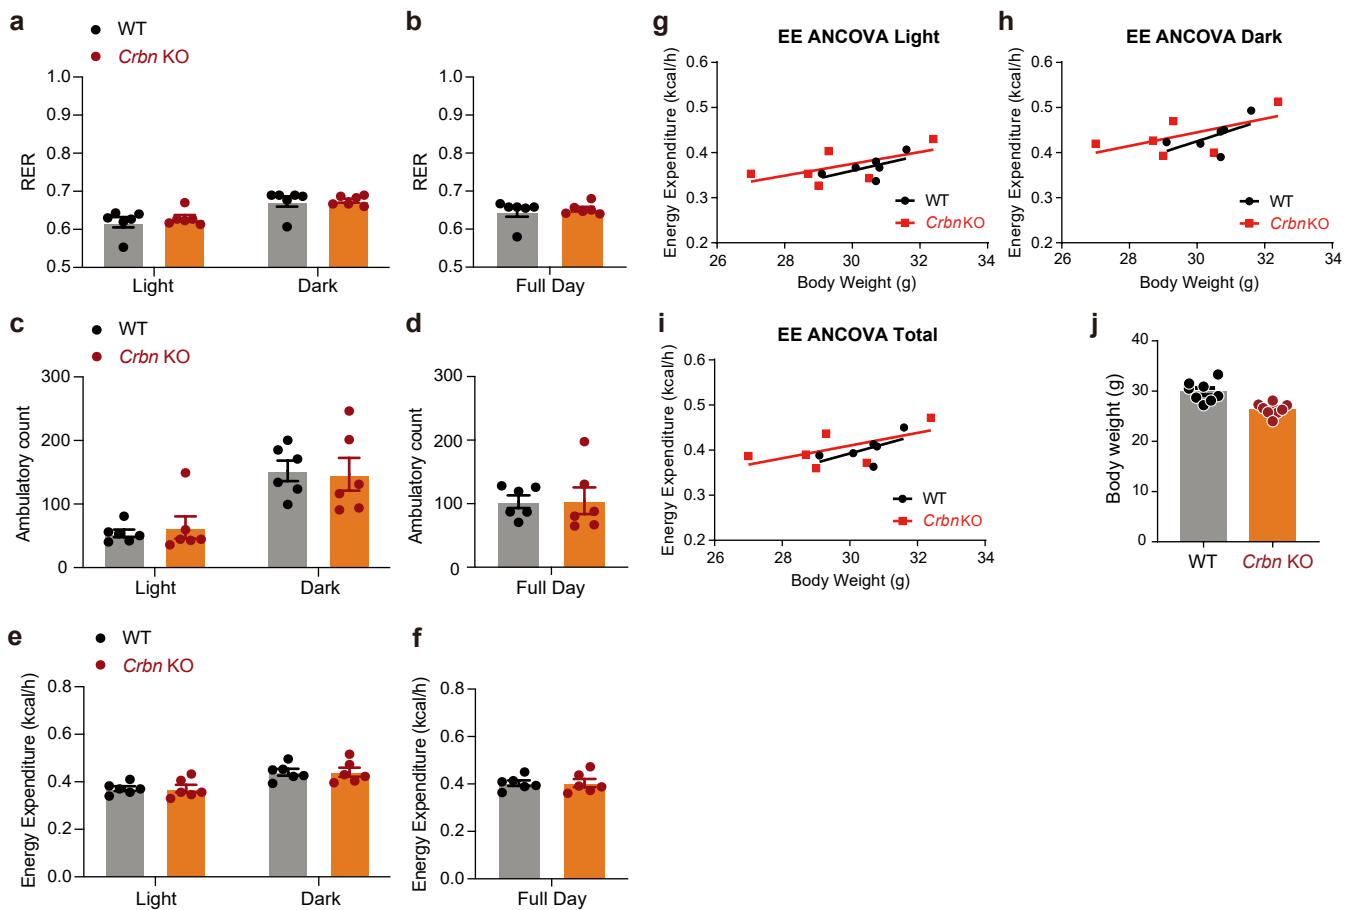

# Supplementary Fig. S3

60%kcal high-fat diet

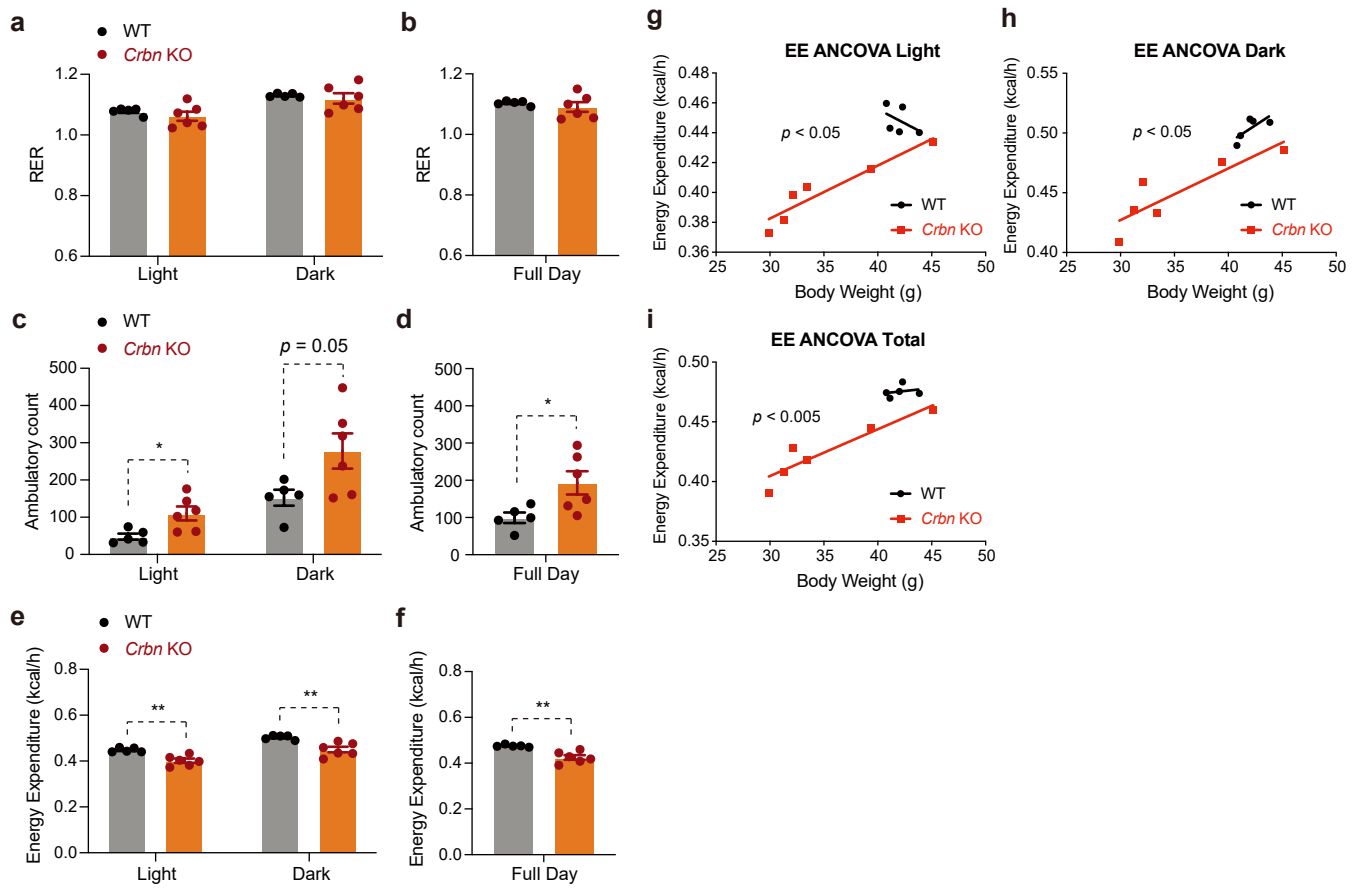

# Supplementary Fig. S4

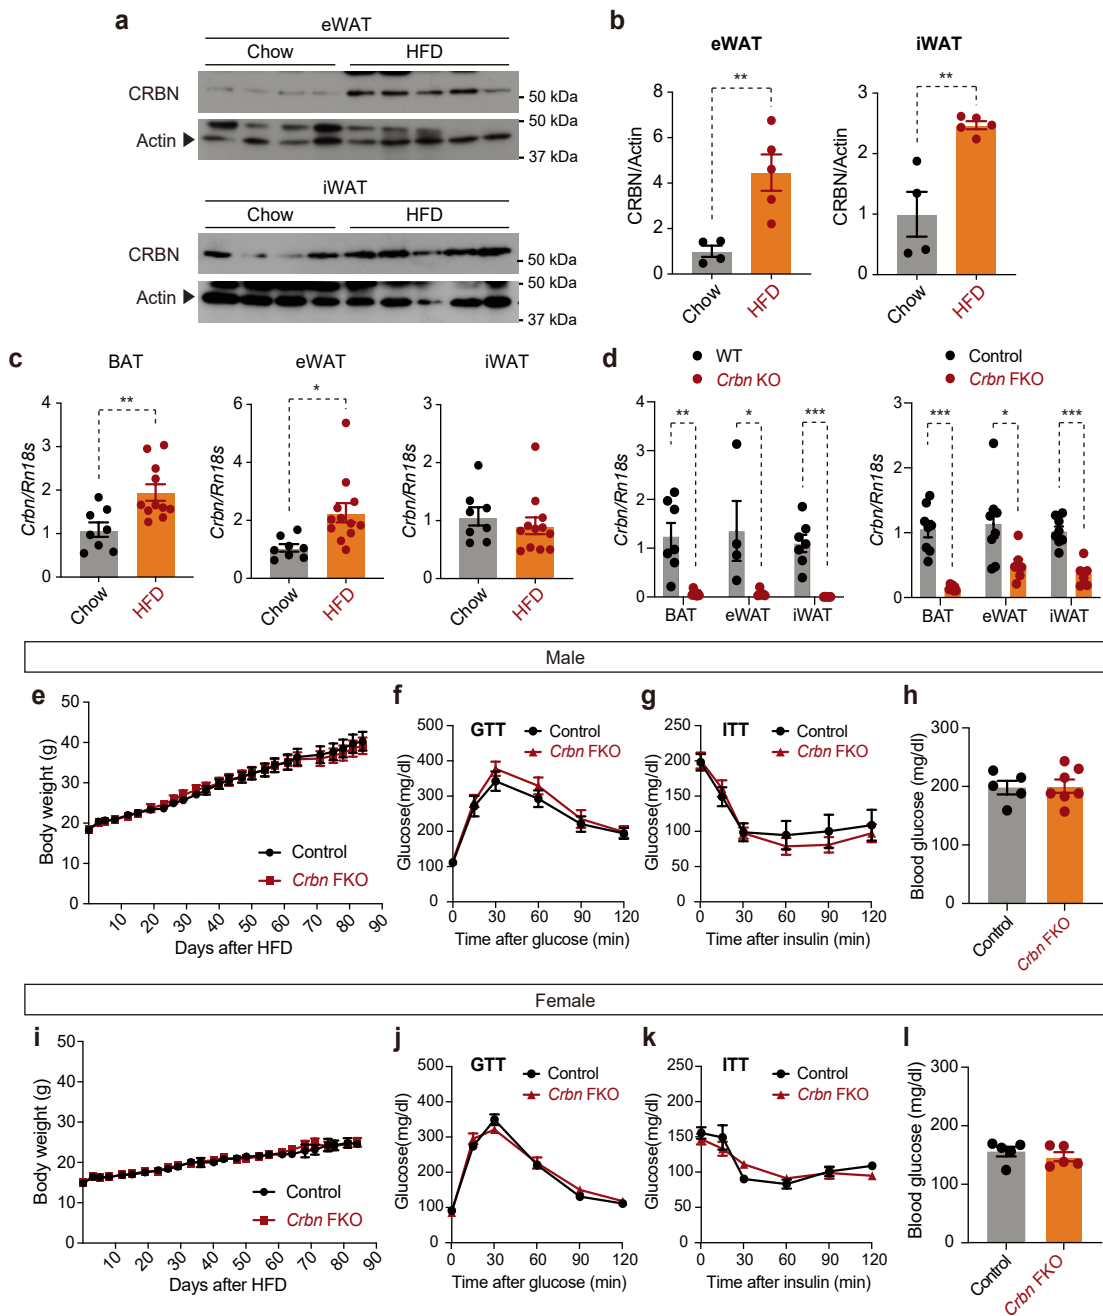

# Supplementary Fig. S5

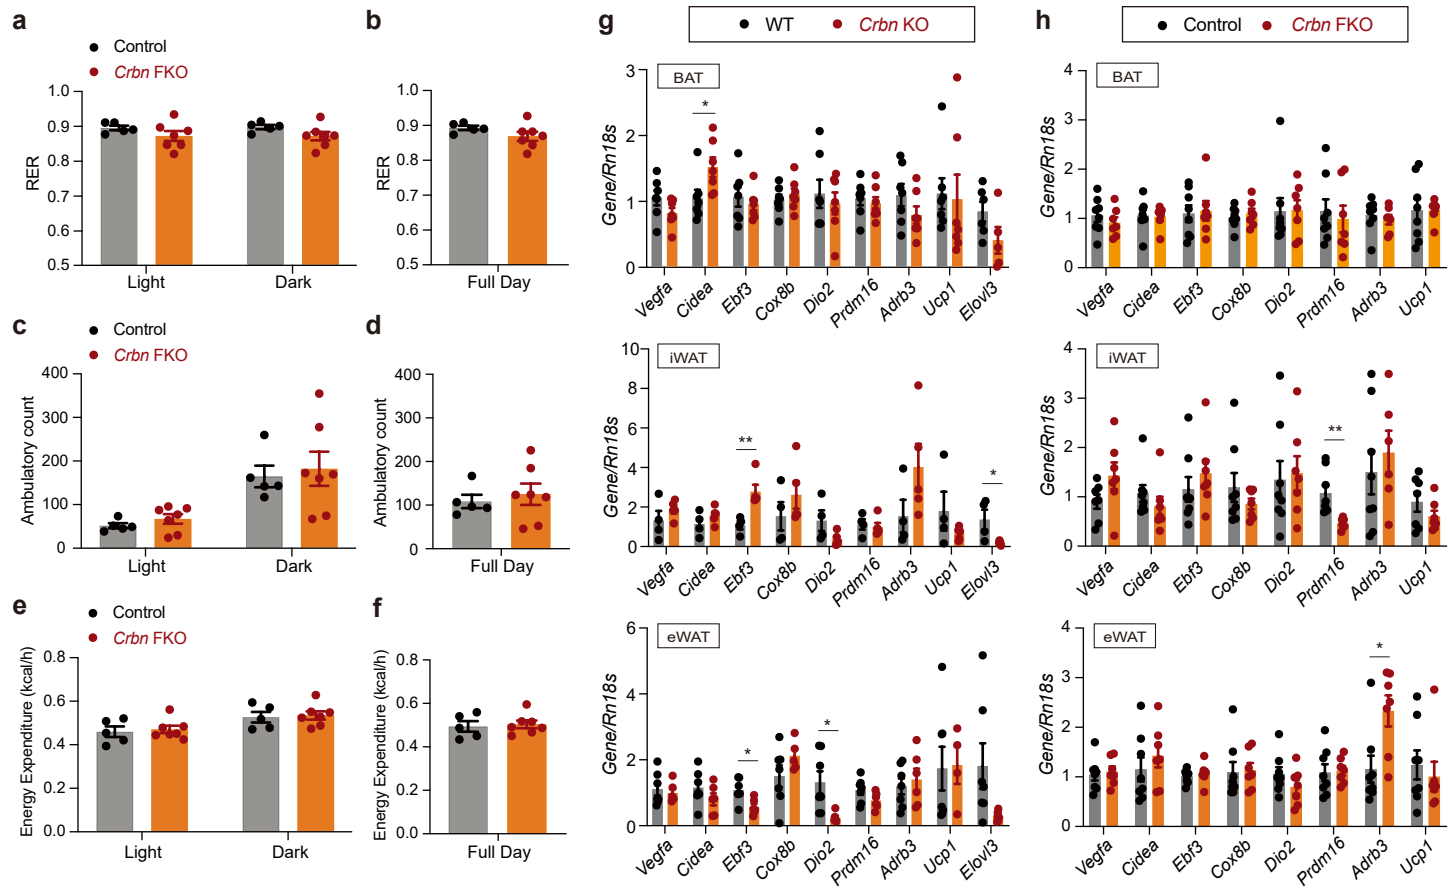

# Supplementary Fig. S6

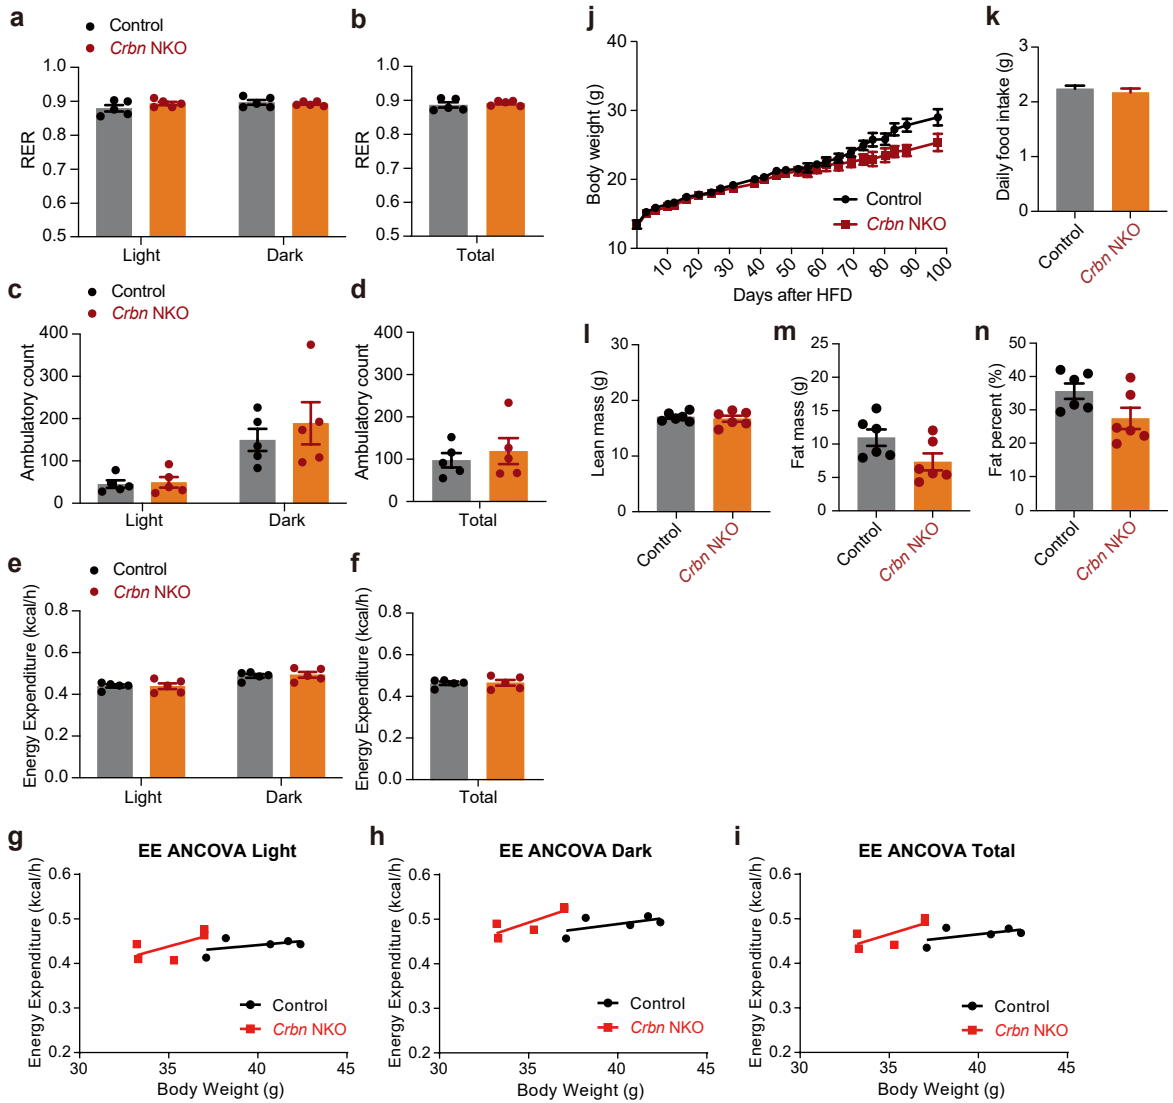

# Supplementary Fig. S7

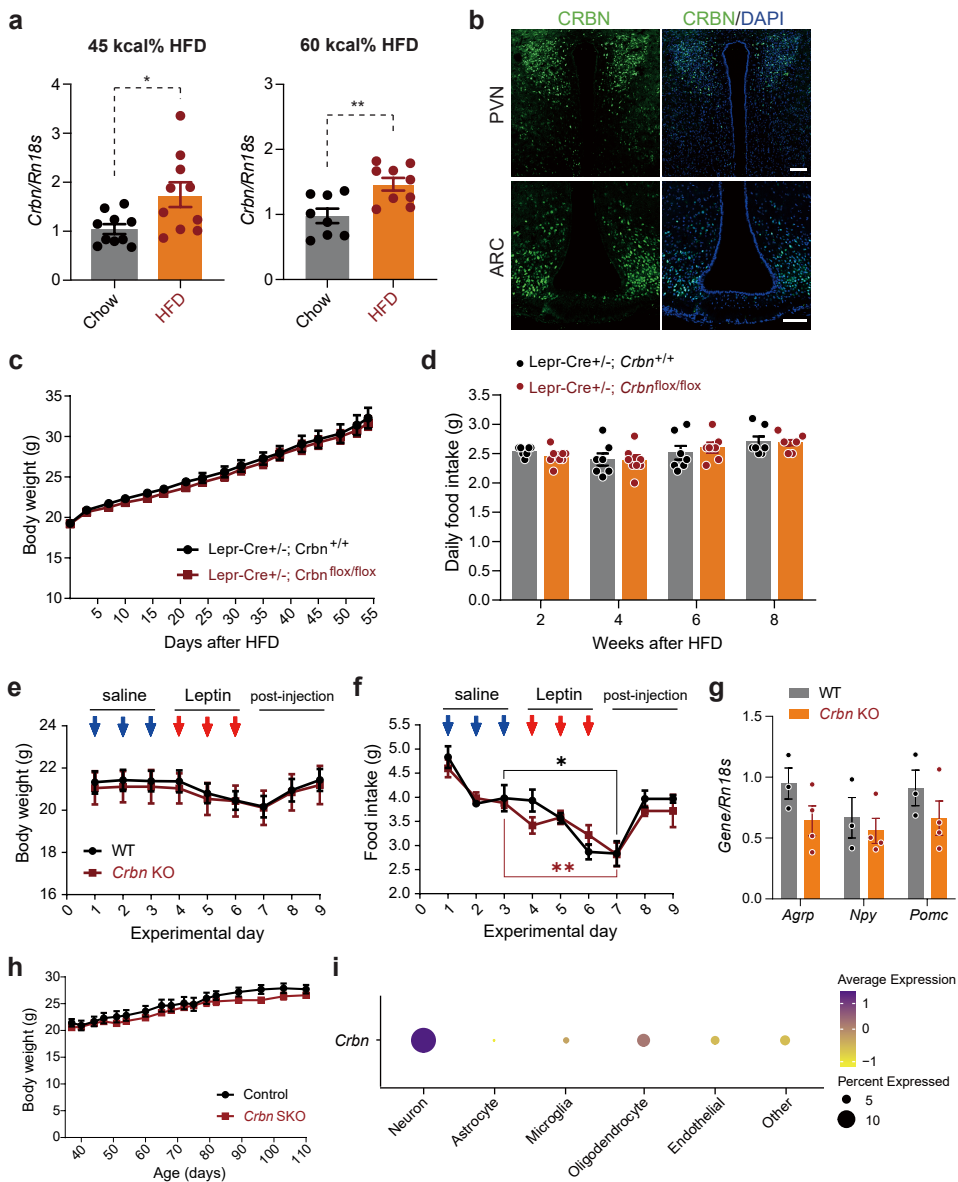

# Supplementary Fig. S8

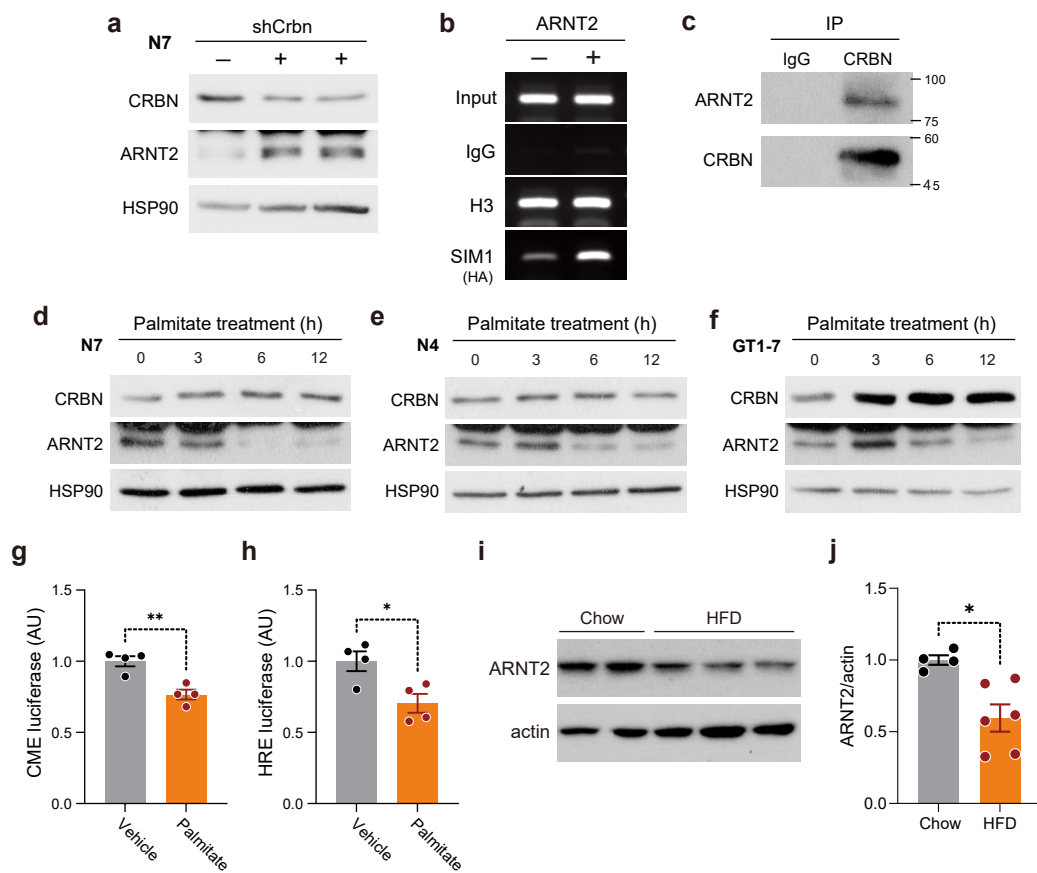

# Supplementary Fig. S9

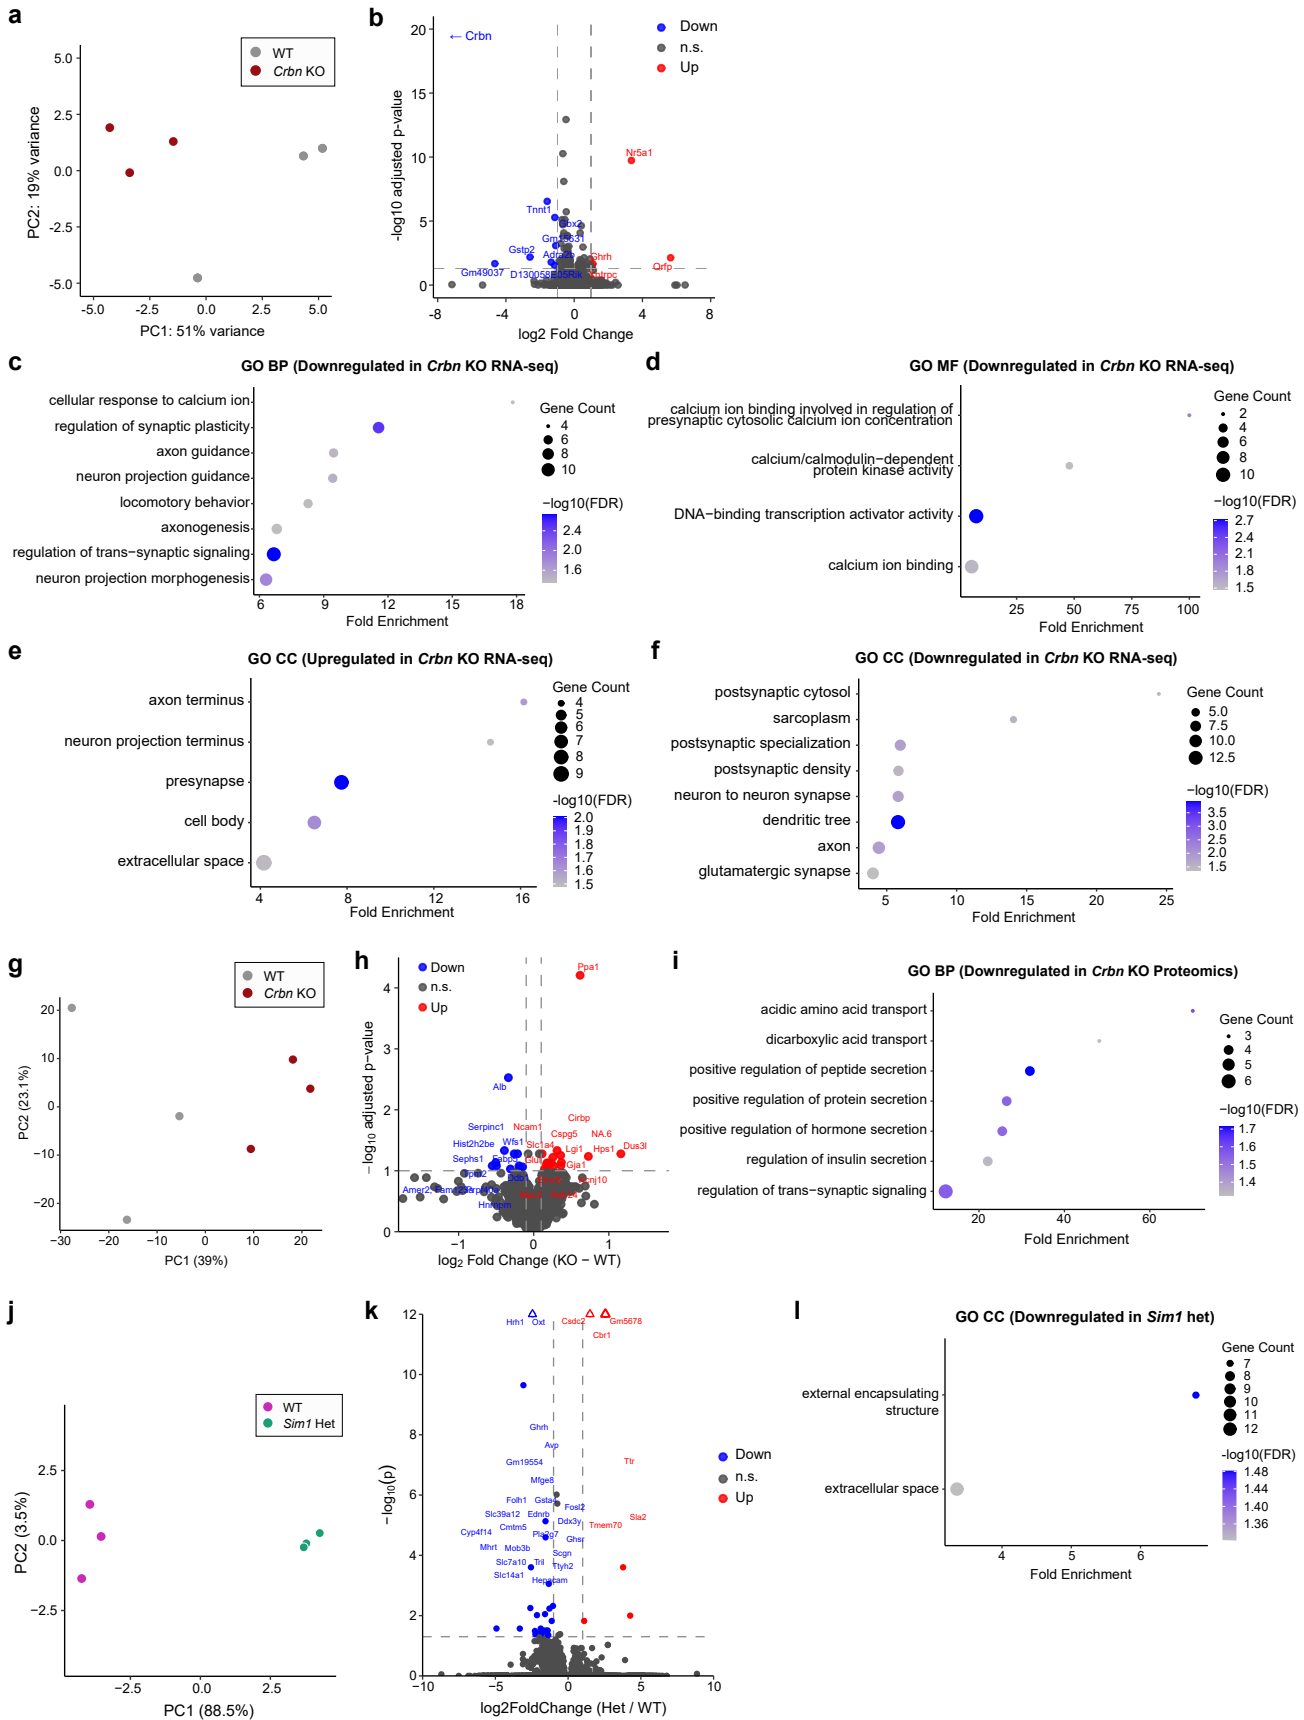

# Supplementary Fig. S10

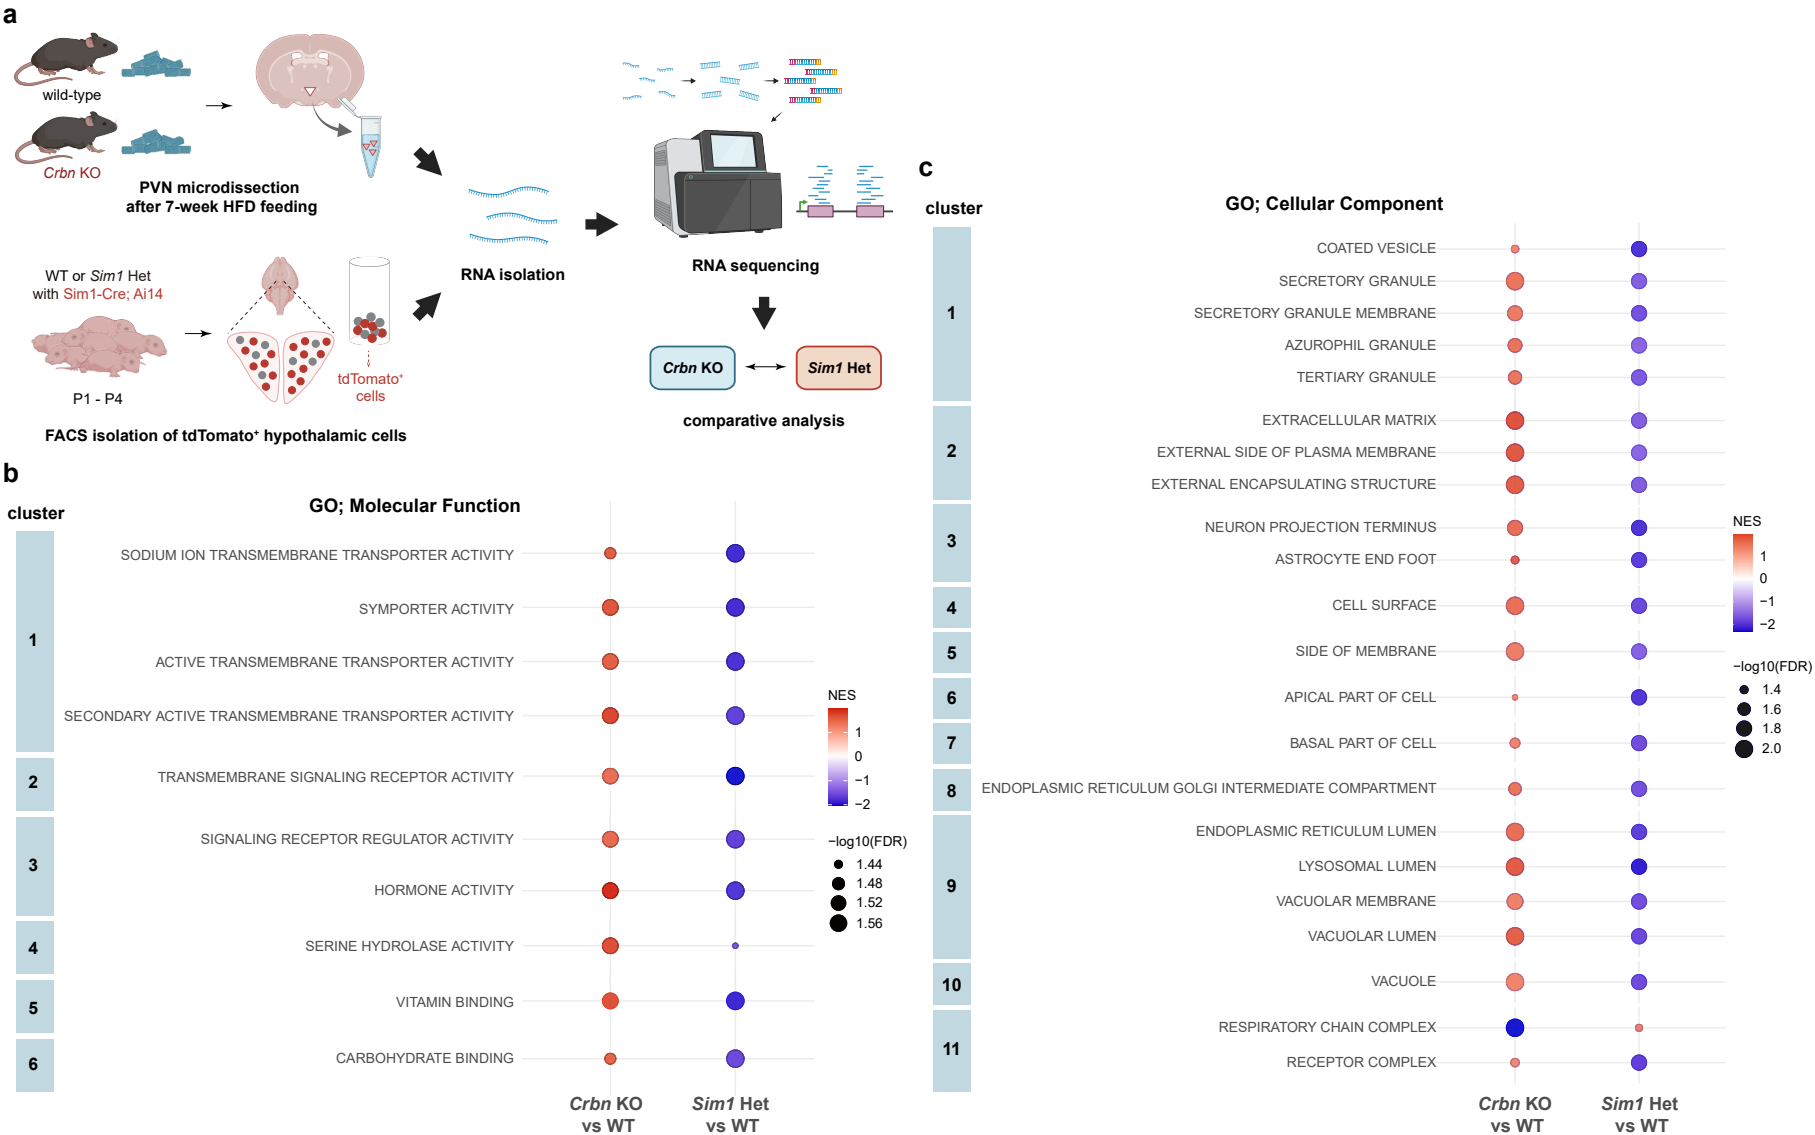

**Table S1. Antibodies used in the current study**

| <b>Antibody</b>                                                                            | <b>Manufacturer</b>       | <b>Catalog number</b> |
|--------------------------------------------------------------------------------------------|---------------------------|-----------------------|
| ARNT2 Rabbit pAb                                                                           | ABclonal                  | A8060                 |
| CRBN (D8H3S) Rabbit mAb                                                                    | Cell Signaling Technology | #71810                |
| Anti-CRBN antibody [4D6]                                                                   | Abcam                     | Ab244223              |
| $\beta$ -Actin (C4)                                                                        | Santa cruz                | Sc-47778              |
| Purified mouse anti-GFAP cocktail                                                          | BD Pharmingen™            | 556330                |
| Anti-Iba1/AIF1                                                                             | Sigma-Aldrich             | MABN92                |
| Anti-NeuN                                                                                  | Sigma-Aldrich             | MAB377                |
| Lamin A/C                                                                                  | Cell Signaling Technology | #2032                 |
| Histone H3 (D2B12) XP® Rabbit mAb (ChIP Formulated)                                        | Cell Signaling Technology | #4620                 |
| Normal Rabbit IgG                                                                          | Cell Signaling Technology | #2729                 |
| Ubiquitin (P4D1) Mouse mAb                                                                 | Cell Signaling Technology | #3936                 |
| c-Myc (9E10)                                                                               | Santa cruz                | sc-40                 |
| HA-Tag (F-7)                                                                               | Santa cruz                | sc-7392               |
| HA-Tag (C29F4) Rabbit mAb                                                                  | Cell Signaling Technology | #3724                 |
| Monoclonal ANTI-FLAG® M2                                                                   | SIGMA-ALDRICH             | F1804                 |
| DYKDDDDK Tag (D6W5B) Rabbit mAb                                                            | Cell Signaling Technology | #14793                |
| Anti-GFP                                                                                   | Roche                     | 11 814 460 001        |
| HRP-linked anti-mouse IgG                                                                  | Cell Signaling Technology | 7076                  |
| HRP-linked anti-rabbit IgG                                                                 | Cell Signaling Technology | 7074                  |
| Goat anti-Mouse IgG (H+L) Cross-Adsorbed Secondary Antibody, Alexa Fluor™ 488              | Invitrogen                | A-11001               |
| Goat anti-Rabbit IgG (H+L) Highly Cross-Adsorbed Secondary Antibody, Alexa Fluor™ Plus 647 | Invitrogen                | A32733                |
| Goat anti-Rabbit IgG (H+L) Cross-Adsorbed Secondary Antibody, Alexa Fluor™ 568             | Invitrogen                | A-11011               |

**Table S2. Oligonucleotides used for mice genotyping**

| Gene             | Sequence (5' - 3')         |
|------------------|----------------------------|
| <i>Crbn</i> WT   |                            |
| F                | CGTTACTTTTCCTGCTCATC       |
| R                | CCGCTAAATAACTACCTCCA       |
| <i>Crbn</i> KO   |                            |
| F                | AATTAGCTTCGTCGA            |
| R                | TGCAGTTCATTCAGG            |
| <i>Crbn</i> flox |                            |
| F                | CAGTCAGATGGGTAAGGAGCA      |
| R                | AAGCAGCTCCGTAATGCTG        |
| Cre              |                            |
| Tg 1084          | GCGGTCTGGCAGTAAAACTATC     |
| Tg 1085          | GTGAAACAGCATTGCTGTCACTT    |
| IPC 7338         | CTAGGCCACAGAATTGAAAGATCT   |
| IPC 7339         | GTAGGTGGAAATTCTAGCATCATCC  |
| Mc4r-Cre         |                            |
| wildtype         | CAATTCATAACGCCCACT         |
| Mutant           | GGCAAACGGACAGAAGCA         |
| Common           | TCCGGAGTCAAGAACTGAGG       |
| Lepr-Cre         |                            |
| Tg F             | GCGGTCTGGCAGTAA AACTATC    |
| Tg R             | GTGAAACAGCATTGCTGTCACTT    |
| IPC F            | CTAGGCCACAGAATTGAAAGATCT   |
| IPC R            | GTAGGTGGAAATTCTAGCATCATCC  |
| Crh-Cre          |                            |
| wildtype         | CACGACCAGGCTGCGGCTAAC      |
| Mutant           | CAATGTATCTTATCATGTCTGGATCC |
| Common           | CTTACACATTCGTCCTAGCC       |
| Ai14             |                            |
| Mutant F         | GGCATTAAAGCAGCGTATCC       |
| Mutant R         | CTGTTCCCTGTACGGCATGG       |
| Wildtype F       | AAGGGAGCTGCAGTGGAGTA       |
| Wildtype R       | CCGAAAATCTGTGGGAAGTC       |

**Table S3. Oligonucleotides used for real-time qPCR**

| <b>Gene</b>   |   | <b>Sequence (5' - 3')</b> |
|---------------|---|---------------------------|
| <i>Rn18s</i>  | F | AGTCCCTGCCCTTTGTACACA     |
|               | R | CGTTCCGAGGGCCTCACT        |
| <i>Crbn</i>   | F | TACCTGGGAGCTGATATGGAGG    |
|               | R | TTCCGCACCATGCTGACTTC      |
| <i>Vegfa</i>  | F | CTGCCGTCCGATTGAGACC       |
|               | R | CCCCTCCTTGTACCACTGTC      |
| <i>Cidea</i>  | F | TGACATTCATGGGATTGCAGAC    |
|               | R | GGCCAGTTGTGATGACTAAGAC    |
| <i>Ebf3</i>   | F | TCACCCTCCCTTCAAACCTGTA    |
|               | R | GTTTCACTGCGGAGATGACAT     |
| <i>Cox8b</i>  | F | TGTGGGGATCTCAGCCATAGT     |
|               | R | AGTGG CTAAGACCCATCCTG     |
| <i>Dio2</i>   | F | AATTATGCCTCGGAGAAGACCG    |
|               | R | GGCAGTTGCCTAGTGAAAGGT     |
| <i>Prdm16</i> | F | ACACGCCAGTTCTCCAACCTGT    |
|               | R | TGCTTGTTGAGGGAGGAGGTA     |
| <i>Adrb3</i>  | F | GGCCCTCTCTAGTTCCCAG       |
|               | R | TAGCCATCAAACCTGTTGAGC     |
| <i>Ucp1</i>   | F | AGGCTTCCAGTACCATTAGGT     |
|               | R | CTGAGTGAGGCAAAGCTGATTT    |
| <i>Elovl3</i> | F | TTCTCACGCGGGTTAAAAATGG    |
|               | R | GAGCAACAGATAGACGACCAC     |
| <i>Agrp</i>   | F | ATGCTGACTGCAATGTTGCTG     |
|               | R | CAGACTTAGACCTGGGAACTCT    |
| <i>Npy</i>    | F | ATGCTAGGTAACAAGCGAATGG    |
|               | R | TGTCGCAGAGCGGAGTAGTAT     |
| <i>Pomc</i>   | F | ATGCCGAGATTCTGCTACAGT     |
|               | R | TCCAGCGAGAGGTCGAGTTT      |
| <i>Mc4r</i>   | F | CCCGGACGGAGGATGCTAT       |
|               | R | TCGCCACGATCACTAGAATGT     |
| <i>Pdyn</i>   | F | CTCCTCGTGATGCCCTCTAAT     |
|               | R | AGGGAGCAAATCAGGGGGT       |
| <i>Crh</i>    | F | CACCTACCAAGGGAGGAGAAG     |
|               | R | AGGACGACAGAGCCACCAG       |
| <i>Avp</i>    | F | GCCAGGATGCTCAACACTACG     |
|               | R | TCTCAGCTCCATGTCAGAGATG    |
| <i>Oxt</i>    | F | TTGGCTTACTGGCTCTGACC      |
|               | R | GGGAGACACTTGGGCATATC      |

**Table S4. Oligonucleotides used for cDNA cloning**

| Gene               | Sequence (5' - 3')          |
|--------------------|-----------------------------|
| Mouse <i>Sim1</i>  |                             |
| F                  | CGAGACACGATGAAAGAAAAGTCT    |
| R                  | ACTTCCATTGGTTATTATAACAGATGT |
| Mouse <i>Arnt2</i> |                             |
| F                  | TTCCCGGCAAGATGGCAA          |
| R                  | CTCAGAAAATGGAGGGAACATGCC    |

**Table S5. Oligonucleotides used for ChIP PCR**

| Gene                     | Sequence (5' - 3')    |
|--------------------------|-----------------------|
| Human Myom2 (motif 1)    |                       |
| F                        | CTGTGCCTCTGATACCCCAG  |
| R                        | GCTATGCTCCCCAGCTCTAA  |
| Human Myom2 (motif 2)    |                       |
| F                        | GATCTTCGCCTCCATCCACC  |
| R                        | CCAGCTCTAAAACGCATGGA  |
| Human Myom2 (motif 2, 3) |                       |
| F                        | CGAGTGAAGACCTGAGTCGT  |
| R                        | AGCATTTGTGCCATTTCGCAG |
